# Supplementary material for: Effects of Intranasal Pseudorabies Virus AH02LA Infection on Microbial Community and Immune Status in the Ileum and Colon of Piglets
Source: PubMed Central journal article supplement (PMC6631256; doi:10.3390/v11060518), 2019-06-05
Supplement: viruses-11-00518-s001.pdf [file viruses-11-00518-s001.pdf]

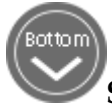

## Supplementary material

### Summary

The supporting information includes 1 supplementary table and 14 supplementary figures.

**Table S1.** Primers for PCR or quantitative real-time PCR

| Primers <sup>1</sup> | Primer sequences (5'-3') | Reference | Annealing temp.(°C) |
|----------------------|--------------------------|-----------|---------------------|
| <i>Beta actin</i> F  | AGAGCGCAAGTACTCCGTGT     | [1]       | 60                  |
| <i>Beta actin</i> R  | ACATCTGCTGGAAGGTGGAC     |           |                     |
| <i>GAPDH</i> F       | TTTGCGTCAGTGTCATCG       | [2]       | 60                  |
| <i>GAPDH</i> R       | TGCTCTGCCTTGGGTAAT       |           |                     |
| <i>18S rRNA</i> F    | CCCACGGAATCGAGAAAGAG     | [3]       | 60                  |
| <i>18S rRNA</i> R    | TTGACGGAAGGGCACCA        |           |                     |
| <i>IL-1β</i> F       | TGAAGTGCCGCACCCAAAACCT   | [1]       | 60                  |
| <i>IL-1β</i> R       | CGGCTCCTCCTTTGCCACAATCA  |           |                     |
| <i>IL-6</i> F        | CCCACCACAAATGCCGGCCT     | [1]       | 60                  |
| <i>IL-6</i> R        | GAGGGAATGCCCCTGGACGG     |           |                     |
| <i>IL-8</i> F        | ACTGGCTGT TGCCTTCTT      | [4]       | 60                  |
| <i>IL-8</i> R        | CAGTT CTCTTCAAAAATATCTG  |           |                     |
| <i>IL-10</i> F       | GTCCGACTCAACGAAGAAGG     | [1]       | 60                  |
| <i>IL-10</i> R       | GCCAGGAAGATCAGGCAATA     |           |                     |
| <i>IFN-γ</i> F       | TCCAGCGCAAAGCCATCAGTG    | [5]       | 60                  |
| <i>IFN-γ</i> R       | ATGCTCTCTGGCCTTGAACATAGT |           |                     |
| <i>TNF-α</i> F       | CCACGCTCTTCTGCCTACTGC    | [4]       | 60                  |
| <i>TNF-α</i> R       | GCTGTCCCTCGGCTTTGAC      |           |                     |
| <i>Mucin-1</i> F     | GGTACCCGGCTGGGGCATTG     | [1]       | 60                  |
| <i>Mucin-1</i> R     | GGTAGGCATCCCGGGTCGGA     |           |                     |
| <i>Mucin-2</i> F     | CTGCTCCGGGTCCTGTGGGA     | [1]       | 60                  |
| <i>Mucin-2</i> R     | CCCGCTGGCTGGTGCGATAC     |           |                     |
| <i>Occludin</i> F    | ATGCTTTCTCAGCCAGCG TA    | [4]       | 60                  |
| <i>Occludin</i> R    | AAG GTTCCATAGCCTCGGTC    |           |                     |
| <i>ZO-1</i> F        | GAGGATGGTCACACCGTGGT     | [4]       | 60                  |
| <i>ZO-1</i> R        | GGAGGATGCTGTTGTCTCGG     |           |                     |
| <i>gE</i> part F     | GGCTTCCACTCGCAGCTCTT     | The study |                     |
| <i>gE</i> part R     | CGCACGTCATCACGAAGGAG     |           |                     |
| <i>gE-Sybr-F</i>     | GGTGTTCGATAATTTGTGGGTGG  | [6]       | 60                  |
| <i>gE-Sybr-R</i>     | GAAAGGGCCGCATGGTCTCA     |           |                     |

<sup>1</sup>IL, interleukin; *IFN-γ*, interferon-γ; *TNF-α*, tumor necrosis factor-α; *ZO-1*, zonula occludens-1.

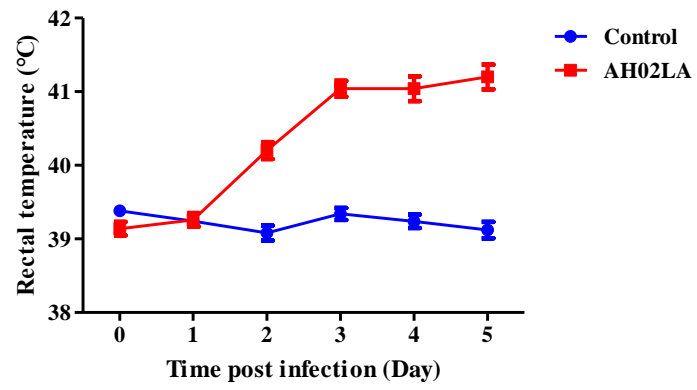

**Figure S1.** Rectal temperatures post intranasal infection with pseudorabies virus (PRV) AH02LA stain. Average temperatures of five piglets of each group were taken for comparison. Error bars represent the standard deviations.

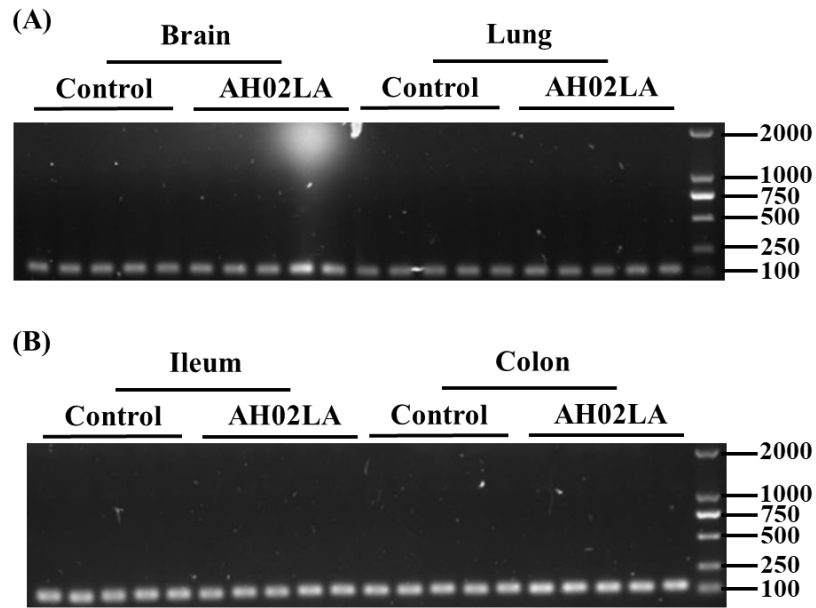

**Figure S2.** Detection of DNA in brain, lung, ileum and colon of piglets. The total DNAs from brain (A), lung (A), ileum (B) and colon (B) were amplified by PCR with a pair of specific primers for *18S rRNA* gene and analyzed by electrophoresis. M: marker DL2000.

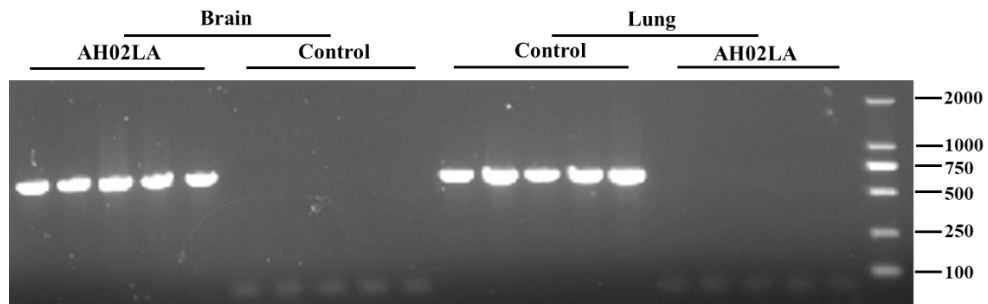

**Figure S3.** Detection of pseudorabies virus (PRV) DNA in the brain and lung of piglets infected PRV AH02LA. The total DNAs from brain and lung were amplified by PCR with a pair of specific primers for *gE* gene and analyzed by electrophoresis. M: marker DL2000.

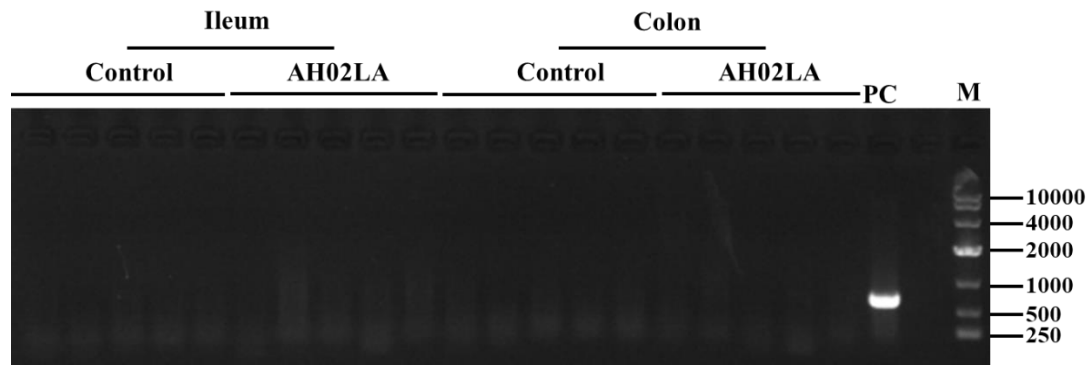

**Figure S4.** Detection of pseudorabies virus (PRV) DNA in the ileal and colonic mucosa of piglets infected PRV AH02LA. The total DNAs from ileal and colonic mucosa were amplified by PCR with a pair of specific primers for gE gene and analyzed by electrophoresis. PC: positive control, DNA from brain of piglets infected AH02LA. M: marker DL10000.

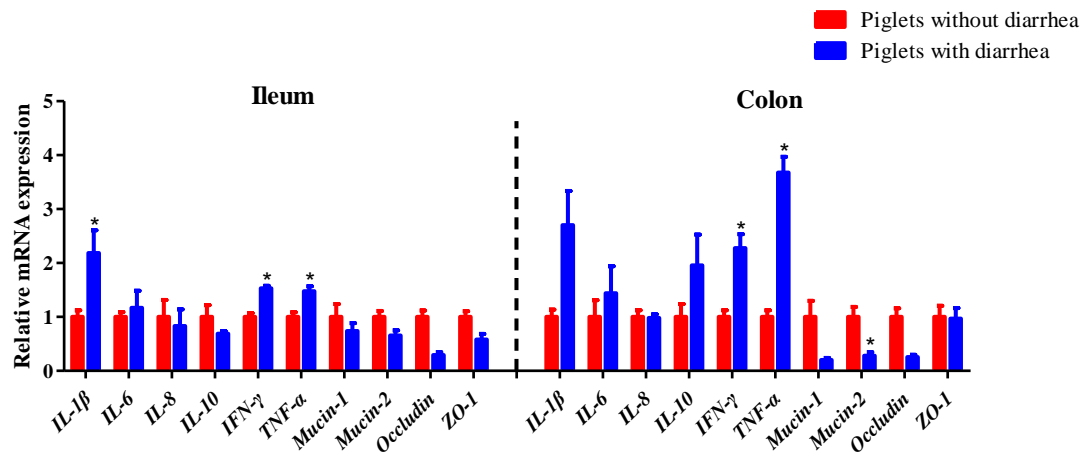

**Figure S5.** The mRNA expression of genes in the ileal and colonic mucosa of piglets with diarrhea (n=3) and without diarrhea (n=7). The values are expressed as the means  $\pm$  SEM. Asterisks indicate statistical differences between different group. \* $P < 0.05$ . The  $\beta$ -actin mRNA level was used to normalize the relative amount of each studied mRNA, and the  $2^{-\Delta\Delta Ct}$  method was used to analyze the data. *IL*, interleukin; *IFN- $\gamma$* , interferon- $\gamma$ ; *TNF- $\alpha$* , tumor necrosis factor- $\alpha$ ; *ZO-1*, zonula occludens-1.

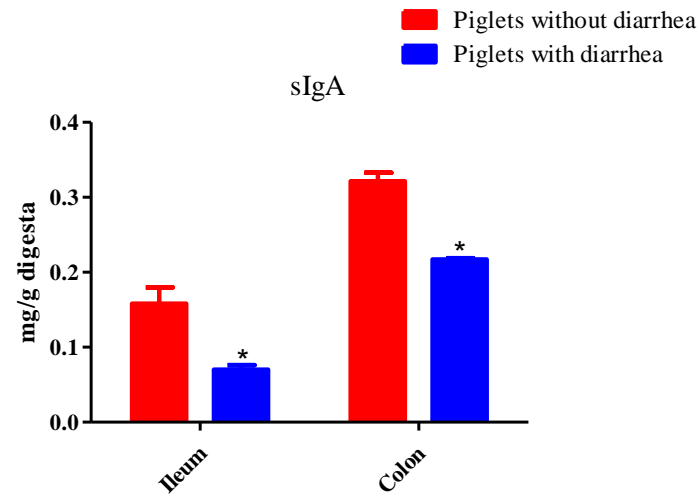

**Figure S6.** The concentration of secretory immunoglobulin A (sIgA) in the ileal and colonic digesta of piglets with diarrhea (n=3) and without diarrhea (n=7). The values are expressed as the means  $\pm$  SEM. Asterisks indicate statistical differences between different group. \* $P < 0.05$ .



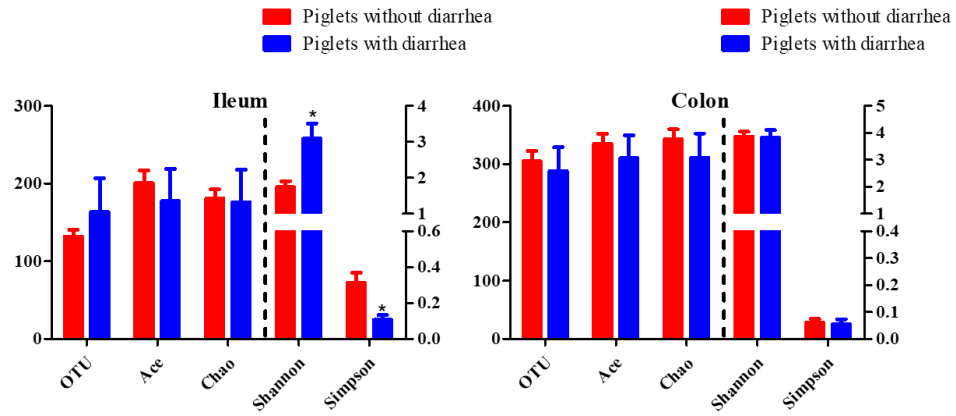

**Figure S7.** Diversity of ileal and colonic bacterial community in piglets with diarrhea (n=3) and without diarrhea (n=7). The values are expressed as the means  $\pm$  SEM. Asterisks indicate statistical differences between different group. \* $P < 0.05$ .

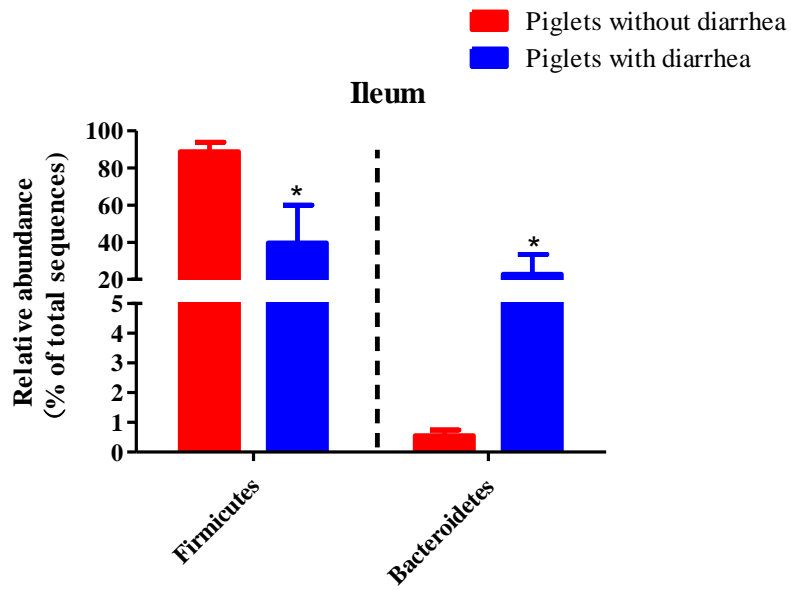

**Figure S8.** Significantly changed phylum in ileal and colonic digesta of piglets with diarrhea (n=3) and without diarrhea (n=7). The values are expressed as the means  $\pm$  SEM. Asterisks indicate statistical differences between different group. \* $P < 0.05$ .

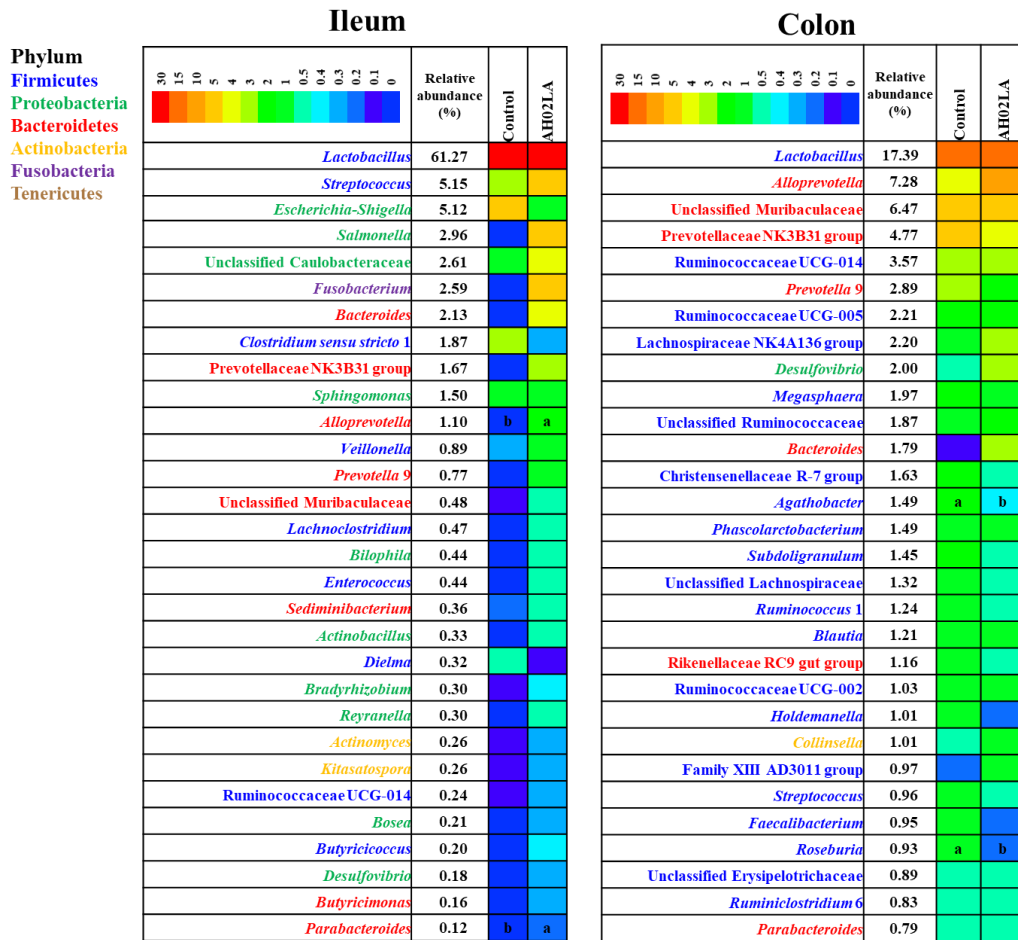

**Figure S9.** Heatmap of dominant genus in the ileum and colon of piglets with control and AH02LA groups. a, b means in a row with different superscripts differ. (Mann–Whitney U test and a false discovery rate < 0.05).

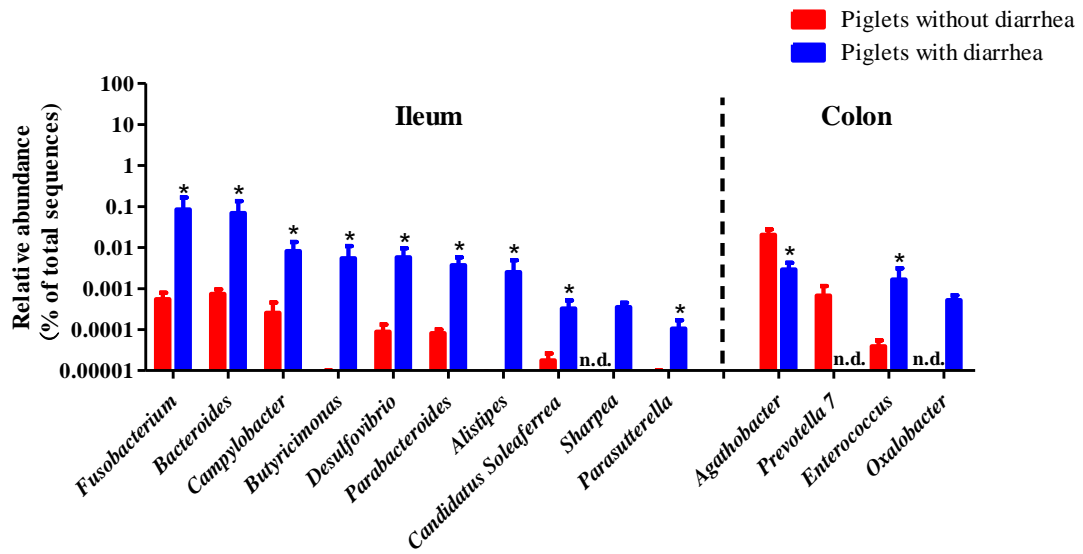

**Figure S10.** Significantly changed genera in the ileal and colonic digesta of piglets with diarrhea (n=3) and without diarrhea (n=7). The values are expressed as the means  $\pm$  SEM. Asterisks indicate statistical differences between different group. \* $P < 0.05$ . n.d., no sequence detected.

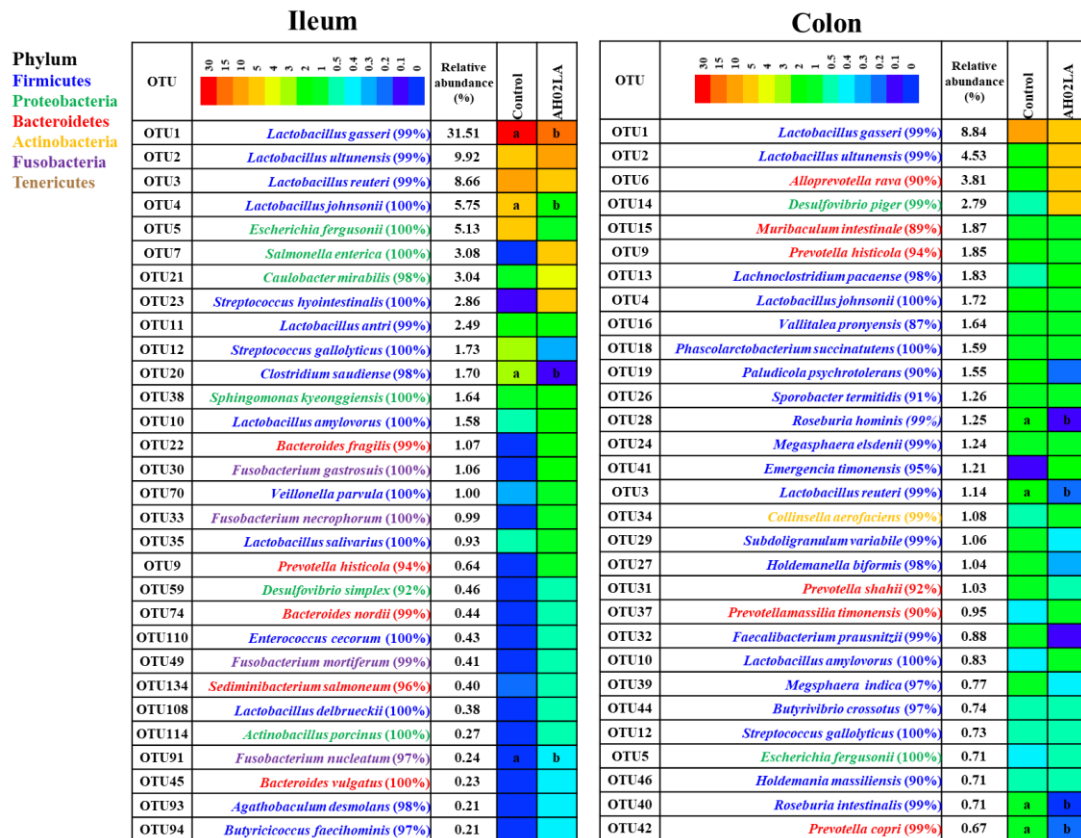

**Figure S11.** Heatmap of dominant OTUs in the ileum and colon of piglets with control and AH02LA groups. a,b means in a row with different superscripts differ. (Mann–Whitney U test and a false discovery rate < 0.05)

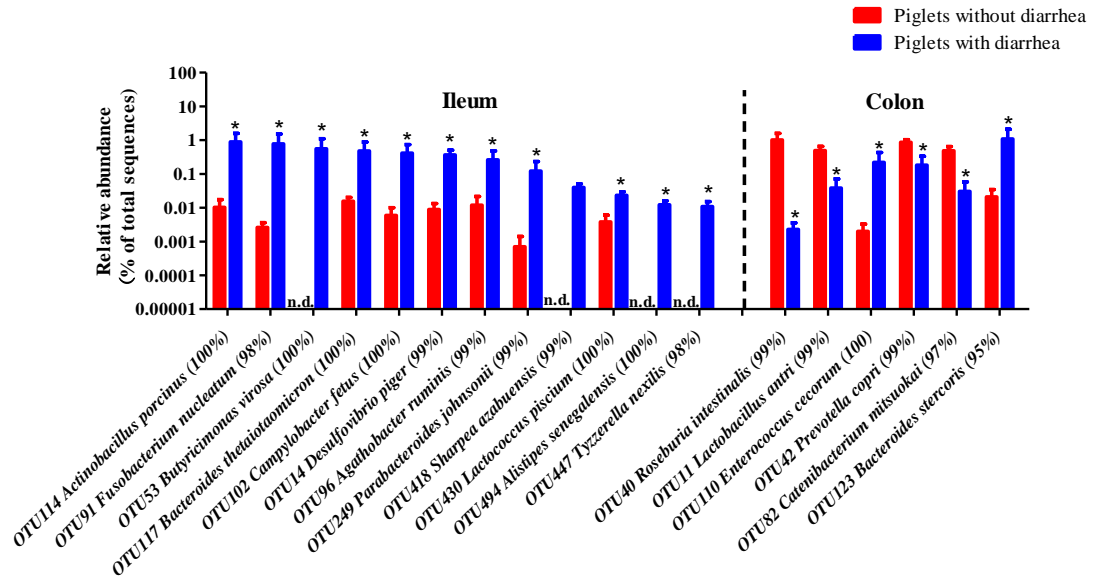

**Figure S12.** Significantly changed bacteria OTUs in the ileal and colonic digesta of piglets with diarrhea (n=3) and without diarrhea (n=7). The values are expressed as the means  $\pm$  SEM. Asterisks indicate statistical differences between different group. \* $P < 0.05$ . n.d., no sequence detected.

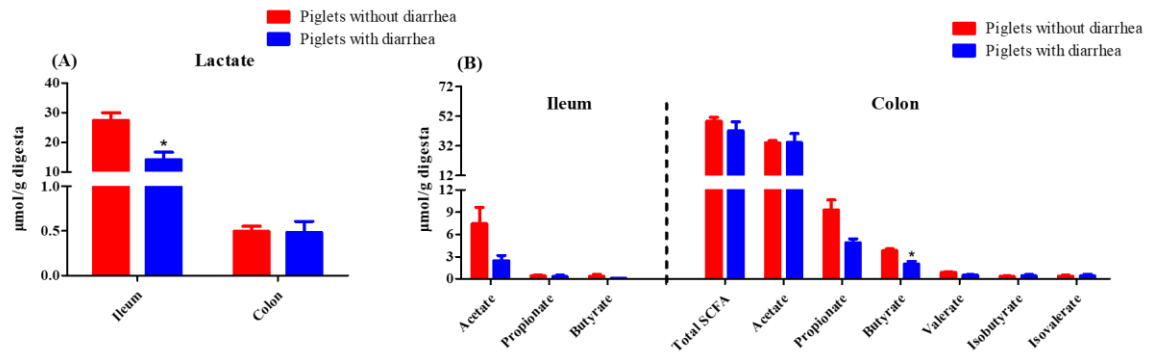

**Figure S13.** The concentrations of lactate (A) and SCFA (B) in the ileal and colonic digesta of piglets with diarrhea (n=3) and without diarrhea (n=7). The values are expressed as the means  $\pm$  SEM. Asterisks indicate statistical differences between different group.  $*P < 0.05$ . SCFA, short-chain fatty acid.

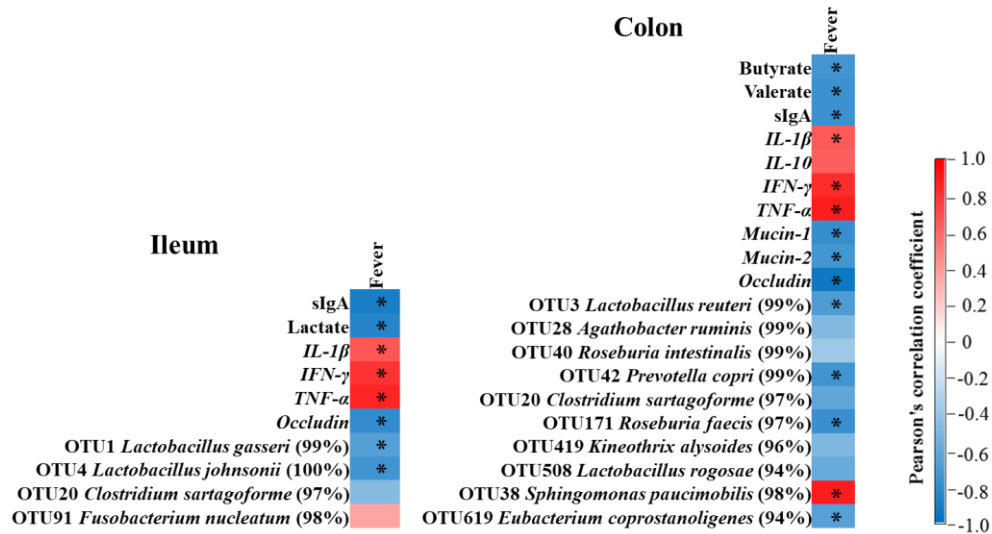

**Figure S14.** Correlation analysis between rectal temperature with immune markers, bacteria or bacterial fermentation products in the ileum and the colon. The red represents a significant positive correlation, and the blue represents a significant negative correlation. \* $P < 0.05$ . *IL*, interleukin; *IFN- $\gamma$* , interferon- $\gamma$ ; *TNF- $\alpha$* , tumor necrosis factor- $\alpha$ ; sIgA, secretory immunoglobulin A.

## References

- Pieper, R.; Kr ger, S.; Richter, J.F.; Wang, J.; Martin, L.; Bindelle, J.; Htoo, J.K.; Von, S.D.; Vahjen, W.; Zentek, J. Fermentable fiber ameliorates fermentable protein-induced changes in microbial ecology, but not the mucosal response, in the colon of piglets. *J. Nutr.* **2012**, *142*, 661-667.
- Fang, L.; Jiang, X.; Su, Y.; Zhu, W. Long-term intake of raw potato starch decreases back fat thickness and dressing percentage but has no effect on the longissimus muscle quality of growing-finishing pigs. *Livest. Sci.* **2014**, *170*, 116-123.
- Genlai, L.; Wen, Y.; Honglin, J. Short-chain fatty acids enhance adipocyte differentiation in the stromal vascular fraction of porcine adipose tissue. *J. Nutr.* **2014**, *144*, 1887.
- Zhou, X.L.; Kong, X.F.; Lian, G.Q.; Blachier, F.; Geng, M.M.; Yin, Y.L. Dietary supplementation with soybean oligosaccharides increases short-chain fatty acids but decreases protein-derived catabolites in the intestinal luminal content of weaned Huanjiang mini-piglets. *Nutr. Res.* **2014**, *34*, 780-788.
- Villodre Tudela, C.; Boudry, C.; Stumpff, F.; Aschenbach, J.R.; Vahjen, W.; Zentek, J.; Pieper, R. Down-regulation of monocarboxylate transporter 1 (MCT1) gene expression in the colon of piglets is linked to bacterial protein fermentation and pro-inflammatory cytokine-mediated signalling. *Br. J. Nutr.* **2015**, *113*, 610-617.
- Chang, C.; Zhang, D.H.; Tang, B.; Liu, G.Y.; Hua, T.; Hou, J.B. Development of SYBR-Green I real-time quantitative PCR assay for detection of Pseudorabies wild-type virus. *Acta Agriculturae Jiangxi.* **2017**, *29*, 1-4.
